# Supplementary material for: Propofol, an Anesthetic Agent, Inhibits HCN Channels through the Allosteric Modulation of the cAMP-Dependent Gating Mechanism
Source: MDPI journal article supplement (doi:10.3390/biom12040570), 2022-04-12
Supplement: s1 [file s1]

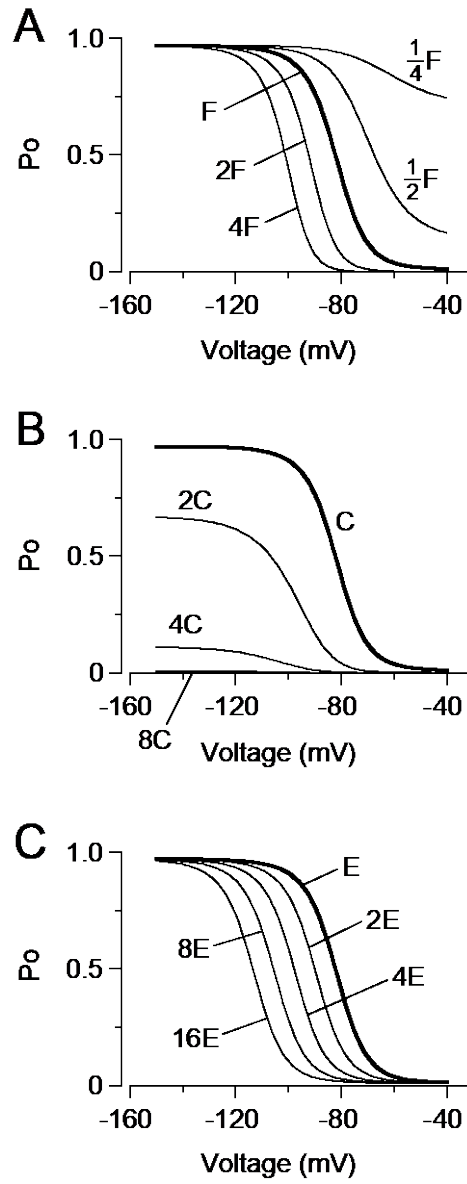

**Figure S1. Effects of changing each parameter on the  $P_O$ - $V$  relationship**

The sensitivity and specificity of individual parameters were examined by changing an allosteric coupling factor  $F$  (A),  $C$  (B), or  $E$  (C) with the other two factors being fixed. The  $P_O$ - $V$  curve obtained for the control experiments was used as a reference (thick line)
